# Supplementary material for: Enhanced validation of antibodies for research applications
Source: PubMed Central journal article supplement (PMC6175901; doi:10.1038/s41467-018-06642-y), 2018-10-08
Supplement: 41467_2018_6642_MOESM2_ESM.pdf [file 41467_2018_6642_MOESM2_ESM.pdf]

# Enhanced validation of antibodies for research applications

Edfors *et al.*

## Supplementary Information

| File                    | Description                                                                                                  |
|-------------------------|--------------------------------------------------------------------------------------------------------------|
| Supplementary Figure 1  | Expression profile of cell line panel used for Western blot validation                                       |
| Supplementary Figure 2  | Western blot images and TMT validation including loading control and                                         |
| Supplementary Figure 3  | Western blot images and PRM validation including loading control                                             |
| Supplementary Figure 4  | Scatter plots of PRM and TMT orthogonal validation                                                           |
| Supplementary Figure 5  | Orthogonal validation using a standardized assay                                                             |
| Supplementary Figure 6  | Examples of independent antibody validation                                                                  |
| Supplementary Figure 7  | Examples of genetic validation (i.e. siRNA knockdown)                                                        |
| Supplementary Figure 8  | Examples of recombinant expression validation                                                                |
| Supplementary Figure 9  | PSMA1 as loading control for Western blot application                                                        |
| Supplementary Figure 10 | SDS-PAGE gel total protein image used for capture MS validation                                              |
| Supplementary Table 1   | The cell lines used in this study                                                                            |
| Supplementary Table 2   | Summary of genes quantified by proteomics-based methods                                                      |
| Supplementary Table 3   | Pearson's r and Spearman rho estimates for all Western blot bands and their correlation with MS and RNA data |
| Supplementary Table 4   | Criteria for validation                                                                                      |
| Supplementary Table 5   | Success rate per method                                                                                      |
| Supplementary Table 6   | QPrESTs used in this assay                                                                                   |
| Supplementary Data 1    | List of the 6,014 antibodies evaluated in this study                                                         |
| Supplementary Data 2    | TPM values for all genes in 56 cell lines                                                                    |
| Supplementary Data 3    | Relative protein abundance (normalized reporter intensity) determined by TMT10plex                           |
| Supplementary Data 4    | Ratio to standard determined by PRM                                                                          |
| Supplementary Data 5    | Western Blot band intensities used for orthogonal validation                                                 |
| Supplementary Data 6    | Antibodies validated within HPA                                                                              |
| Supplementary Data 7    | Capture MS intensities for each analyzed gel piece                                                           |
| Supplementary Data 8    | Molecular weight for the largest transcript                                                                  |
| Supplementary Data 9    | Protein quantification by TMT proteomics performed in triplicate                                             |
| Supplementary Data 10   | PRM peptide coordinates                                                                                      |
| Supplementary Data 11   | Peptide ratios from PRM used to determine protein abundance                                                  |

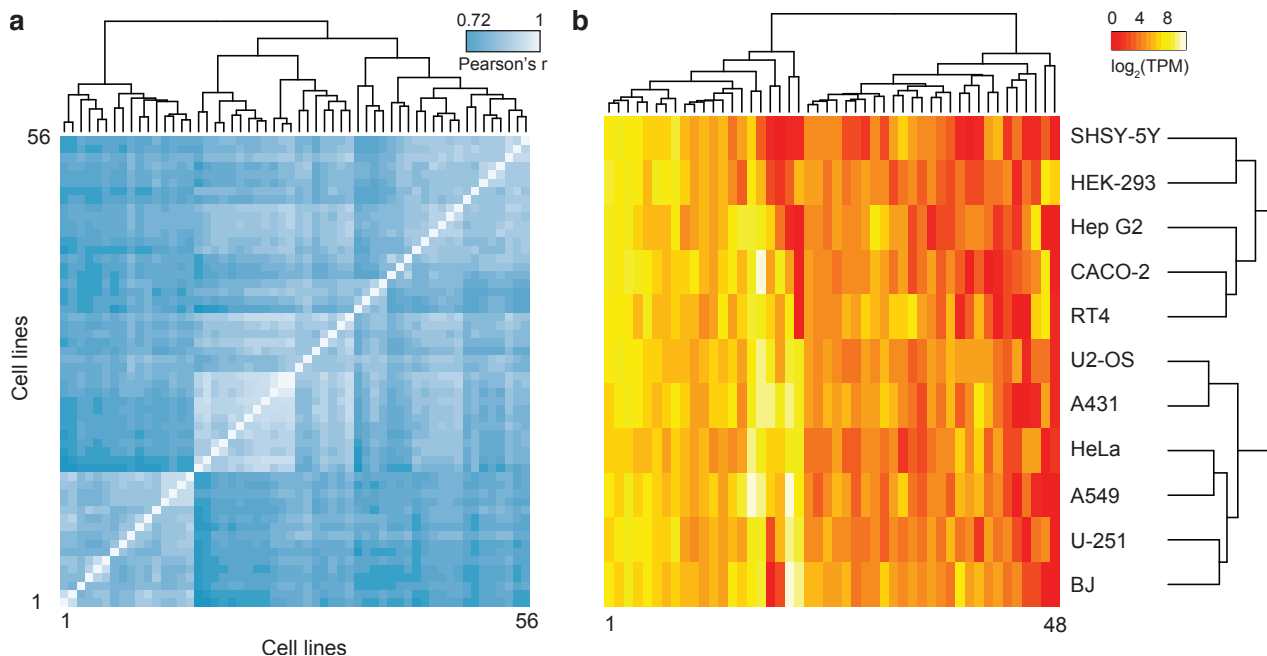

**Figure S1 - Transcriptomics-based selection of cell-line panel used for orthogonal validation of antibodies for Western blot application.** **a.** Clustering of cell lines based on correlation given as Pearson's R for the gene expression from 56 human cell-lines. Expression given as Transcript Per Million (TPM) was  $\log_2$  transformed and we included all protein coding genes covered by the Human Protein Atlas ( $n=19,628$ ) in the analysis. Cell lines were chosen based to be as distant from each other as possible in the dendrogram. The transcriptomics data for all cell lines can be found in **Table S3**. **b.** Gene expression ( $\log_2(\text{TPM})$ ) across cell lines for the 48 genes used in the orthogonal validation.

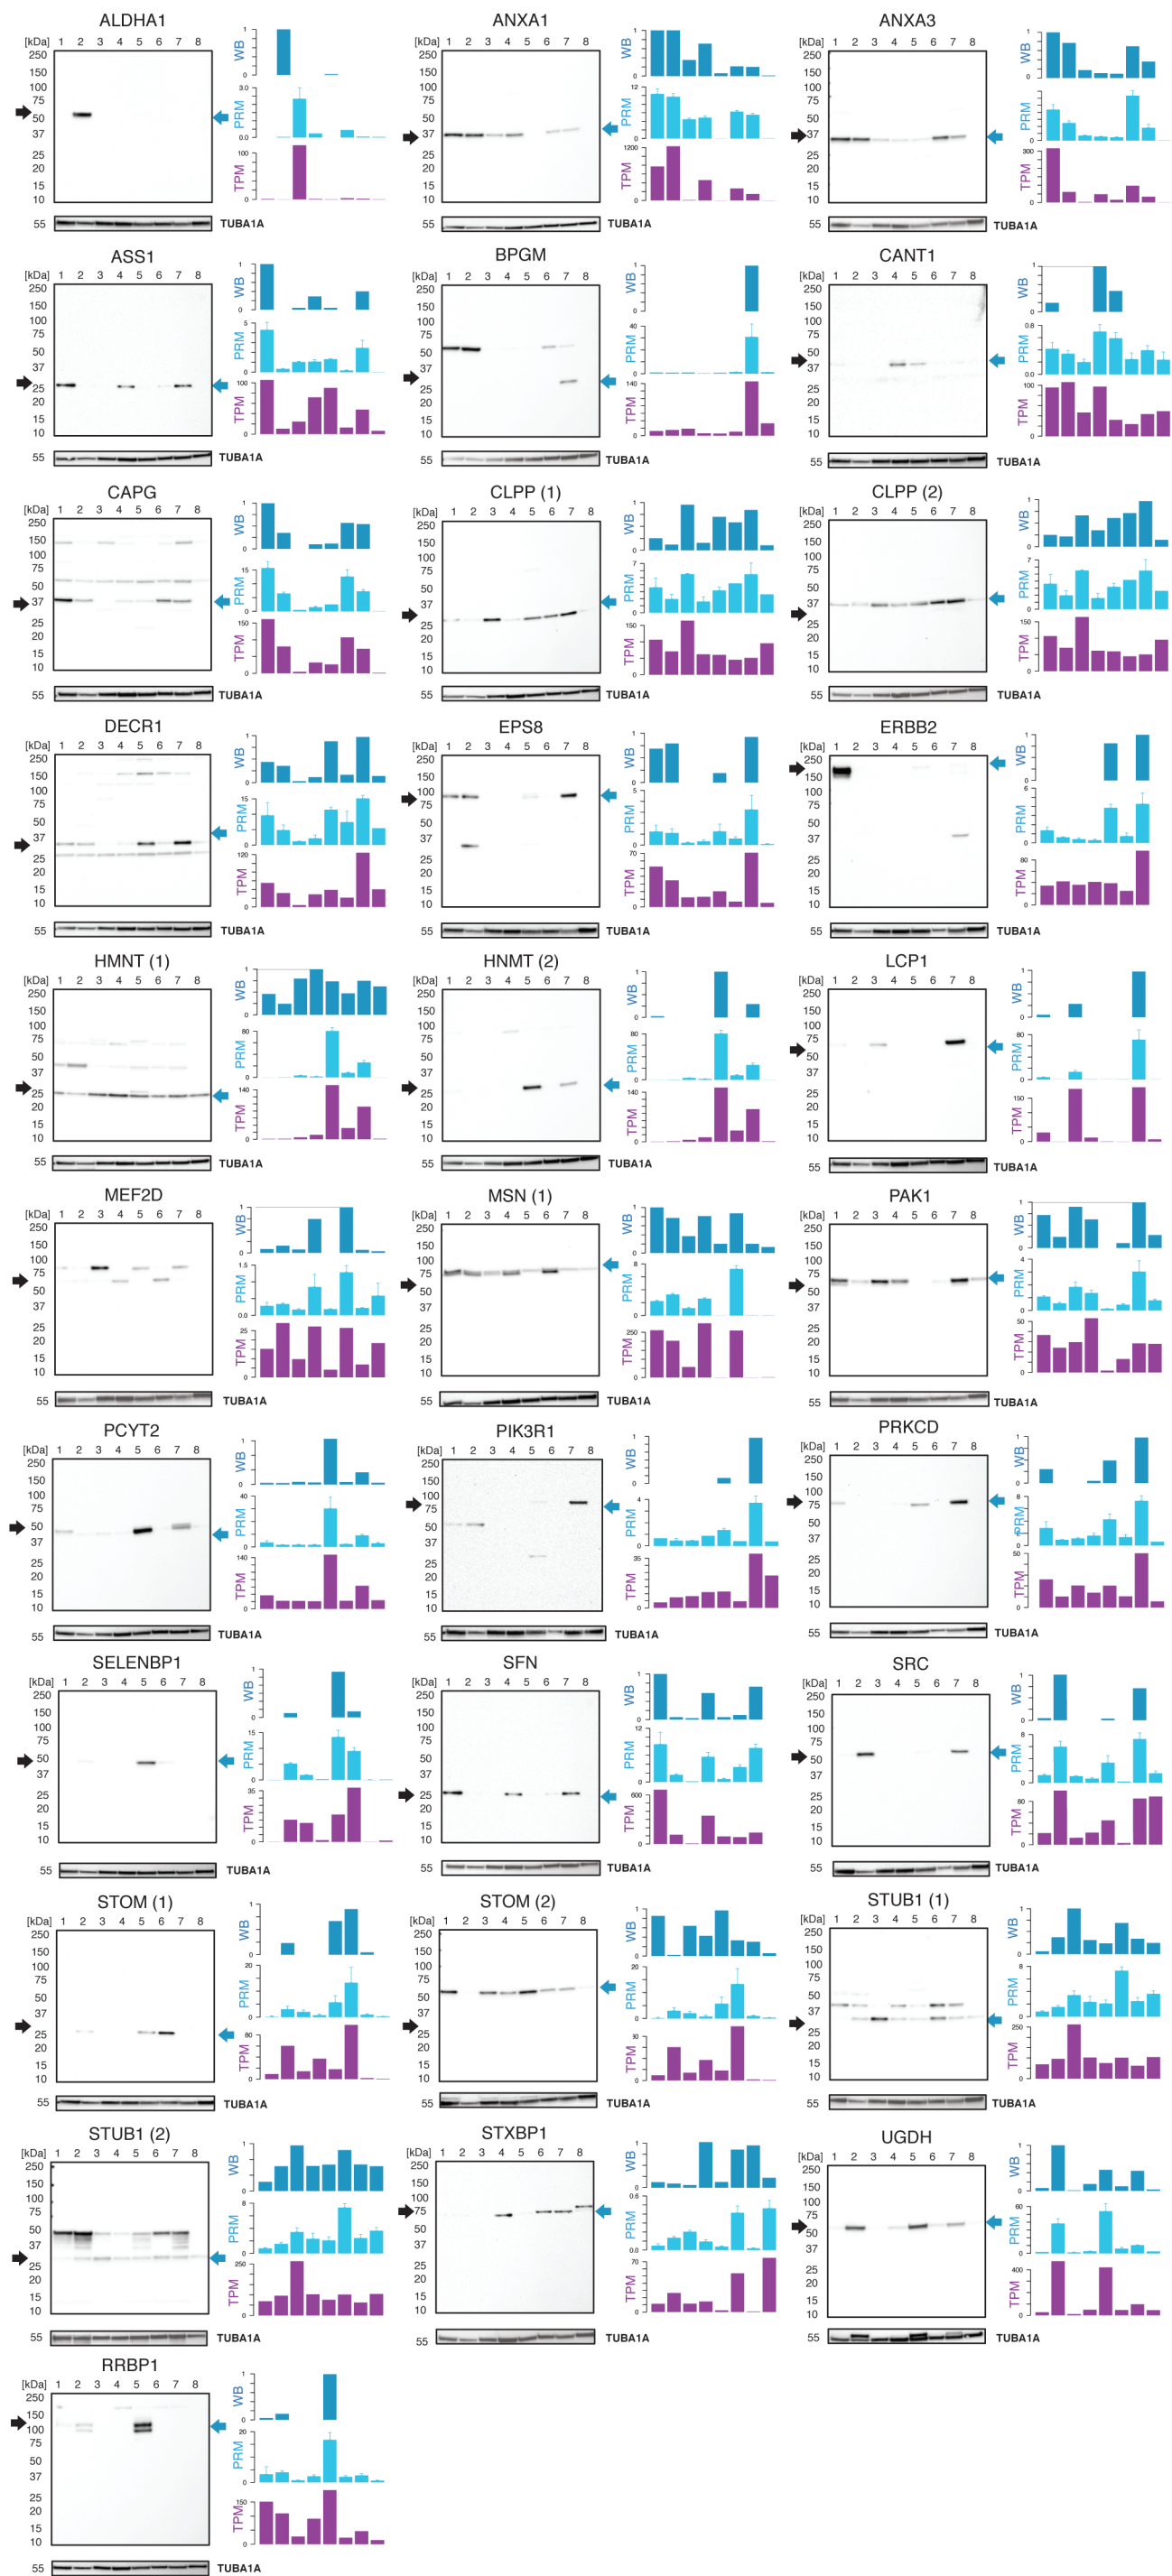

**Supplementary Fig. 2 - Western blots for antibodies and corresponding protein levels quantified by PRM and RNA-levels determined by RNA-seq.** The assay was performed on eight cell-lines (A431, A549, HEK-293, U-2 OS, Hep G2, HeLa, RT4 and SH-SY5Y). The black arrow indicates expected molecular weight, and the blue arrow represents the integrated Western blot band used in the analysis. A loading control is included for all blots targeting tubulin 1-alpha (TUBA1A). Western blot intensities (WB) are summarized in **Supplementary Table 16**. Ratio-to-standard (PRM) are summarized in **Supplementar Table 4** and Transcripts per million (TPM) are summarized in **Supplementar Table 3**. Error bars represent 1 s.d. across three technical replicates.

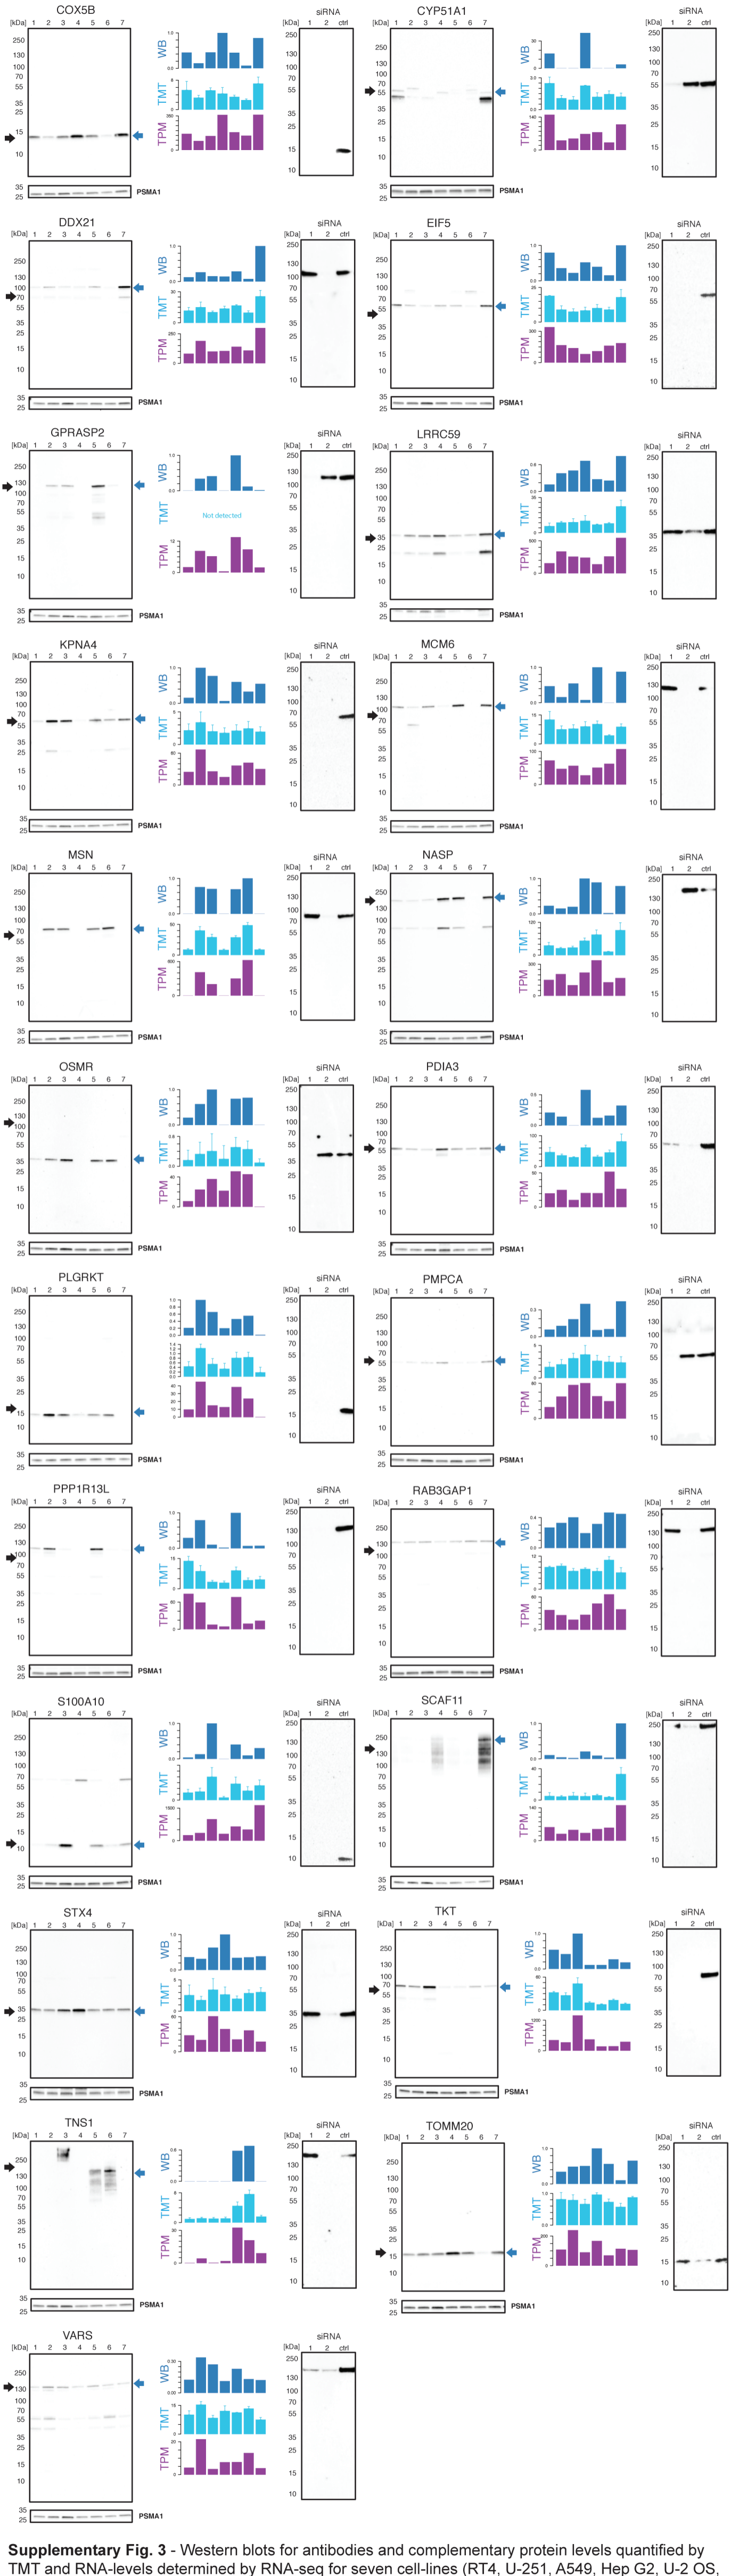

**Supplementary Fig. 3** - Western blots for antibodies and complementary protein levels quantified by TMT and RNA-levels determined by RNA-seq for seven cell-lines (RT4, U-251, A549, Hep G2, U-2 OS, BJ, CACO-2). The black arrows indicate expected molecular weight, and the blue arrows represent the integrated Western blot band used in the analysis. A loading control is included for all blots targeting the proteasome subunit alpha 1 (PSMA1, Figure S7). Each antibody were verified by siRNA knock-down in U-2 OS using two siRNA reagents (1-2), including one scrambled siRNA as control (ctrl). Western blot intensities (WB) are summarized in **Supplementary Table 16**. Normalized reporter ion intensities (TMT) are summarized in **Supplementary Table 5** and Transcripts per million (TPM) are summarized in **Supplementary Table 3**. Error bars represent 1 s.d. across three technical replicates.



**a**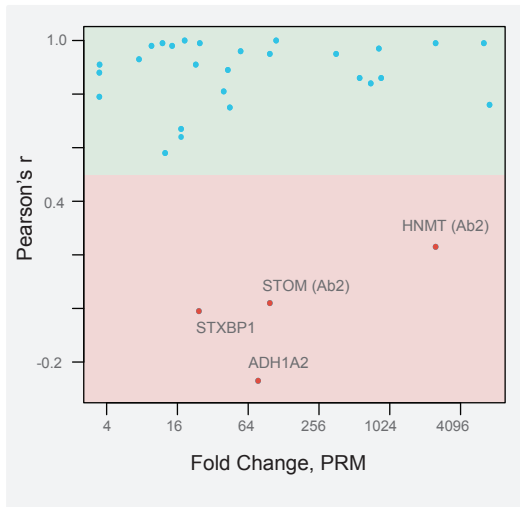**b**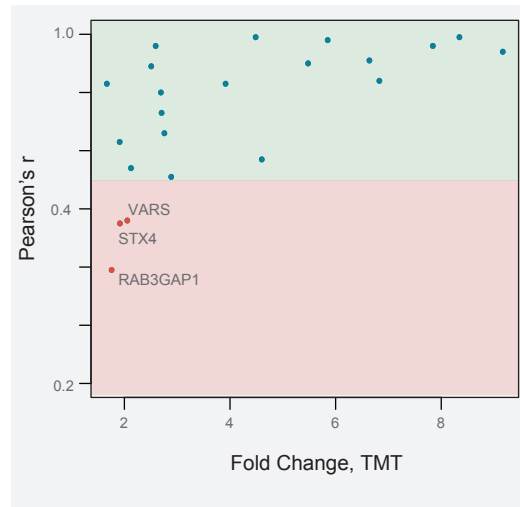

**Figure S4 – Scatter plots of fold change for PRM and TMT. a.** Scatter plot showing the correlation as a function of difference in protein levels determined by PRM. **b.** Scatter plot showing the correlation as a function of difference in protein levels determined by TMT

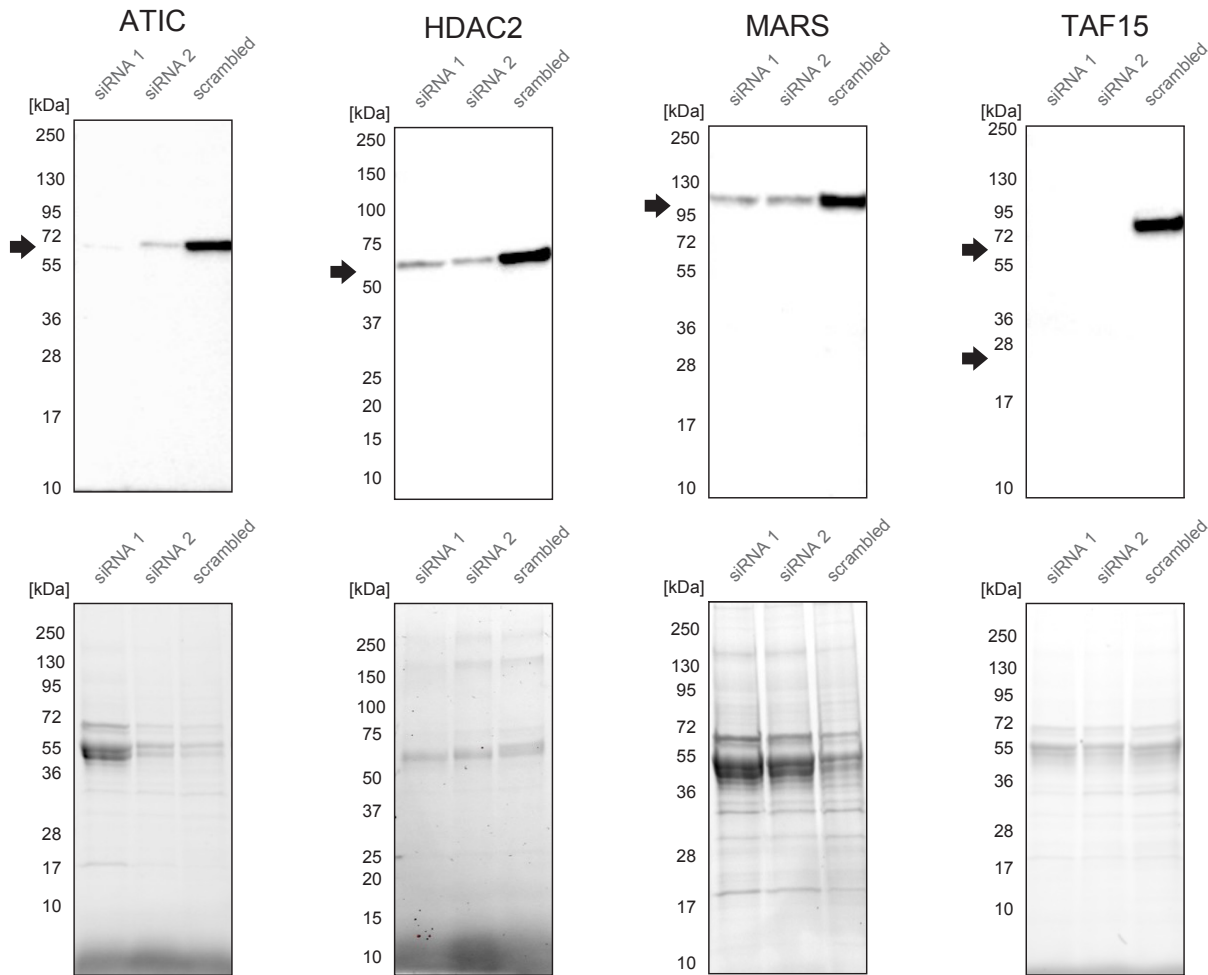

**Supplementary Figure 7 - Examples of genetic validation (i.e. siRNA knock-down).**

Four example genes with antibodies validated by siRNA knock-down. The top row shows two target specific siRNA reagents together with a control (scrambled) for each antibody. The black arrow represents expected molecular weight. The lower row represents total protein gel images used as loading control for each Western blot.

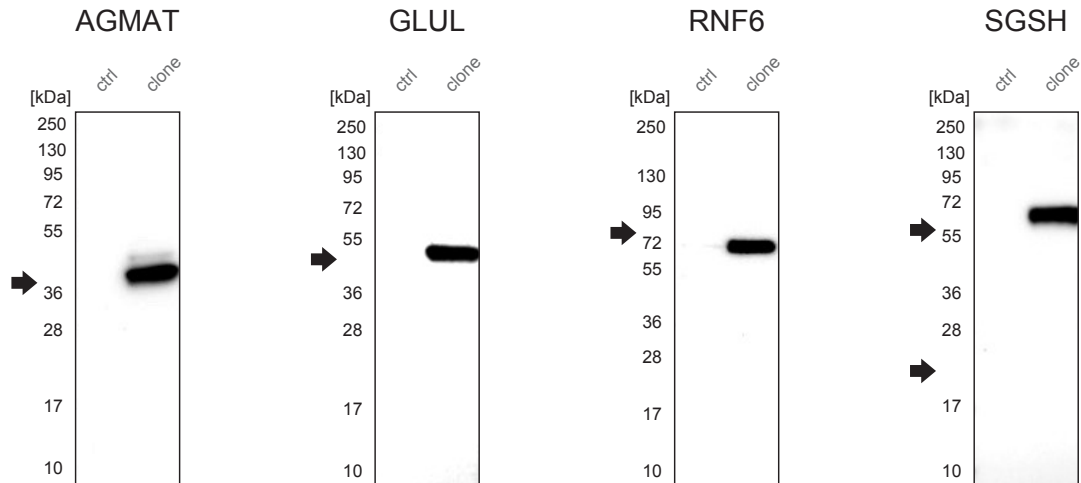

**Supplementary Figure 8 - Examples of recombinant expression for antibody validation.** Four example genes with overexpression lysates (clone) of the protein target including non-expressing control (ctrl). The black arrow represents expected molecular weight.

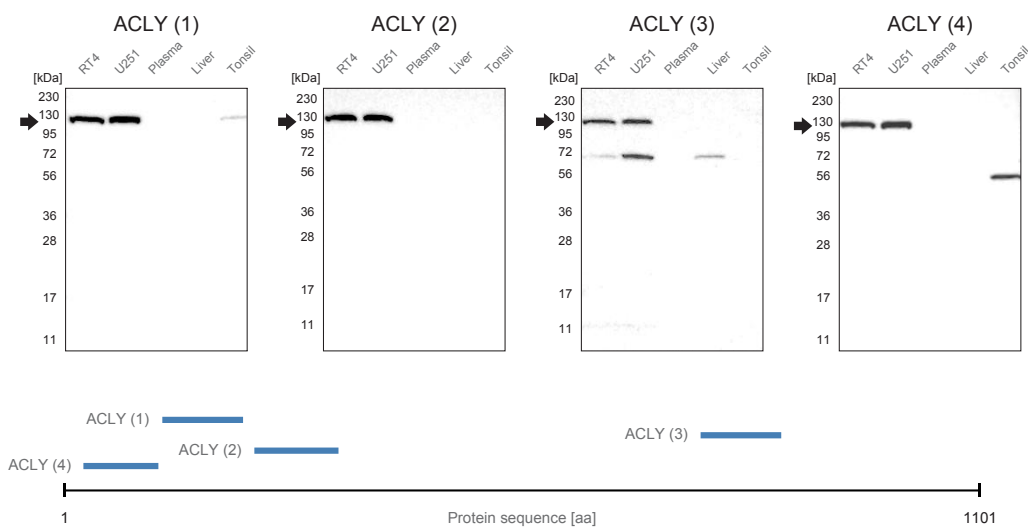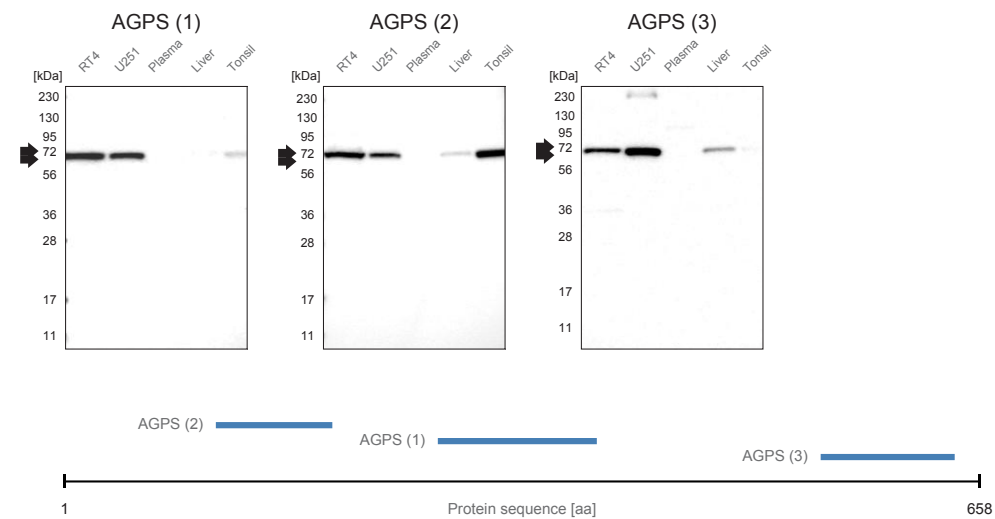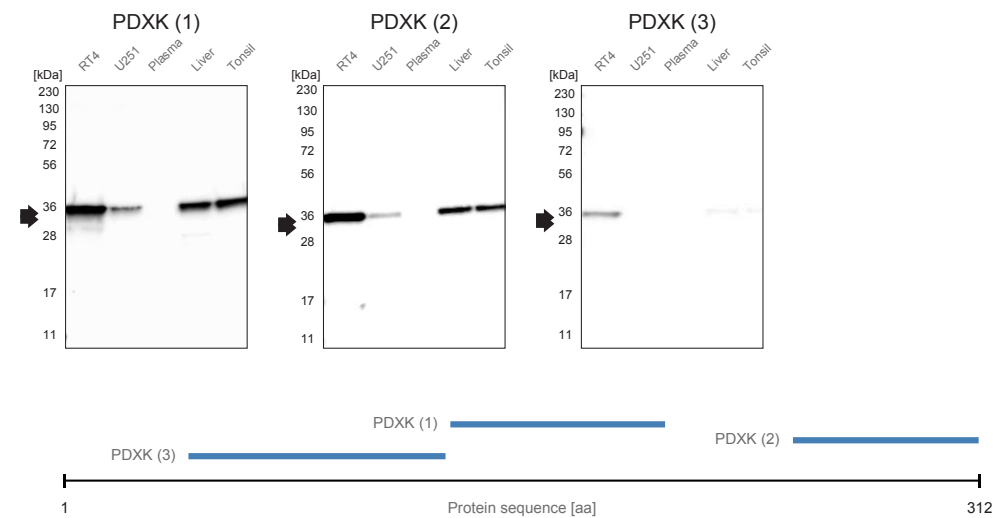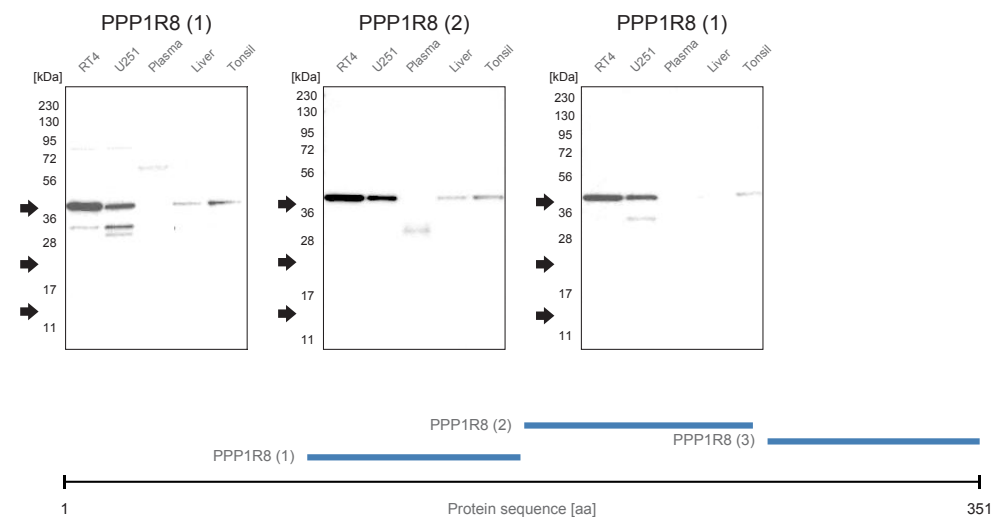

**Supplementary Figure 6 - Examples of independent antibody validation.** Four example genes with non-overlapping antigen sequences used for independent antibody validation performed in a panel consisting of two cell-lines (RT4, U-251), human plasma, and two tissues (liver, tonsil). The black arrow represents expected molecular weight, and the schematic figure illustrates protein fragment sequences (blue) used for antibody generation



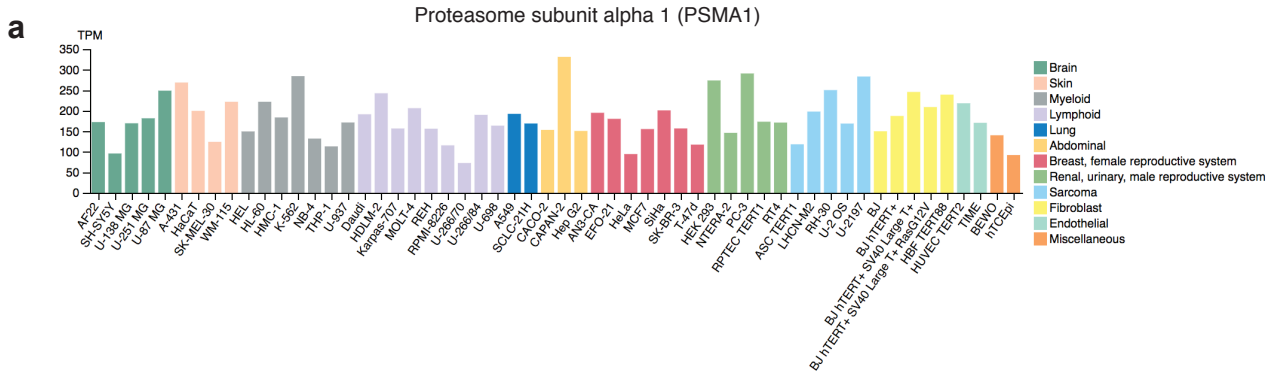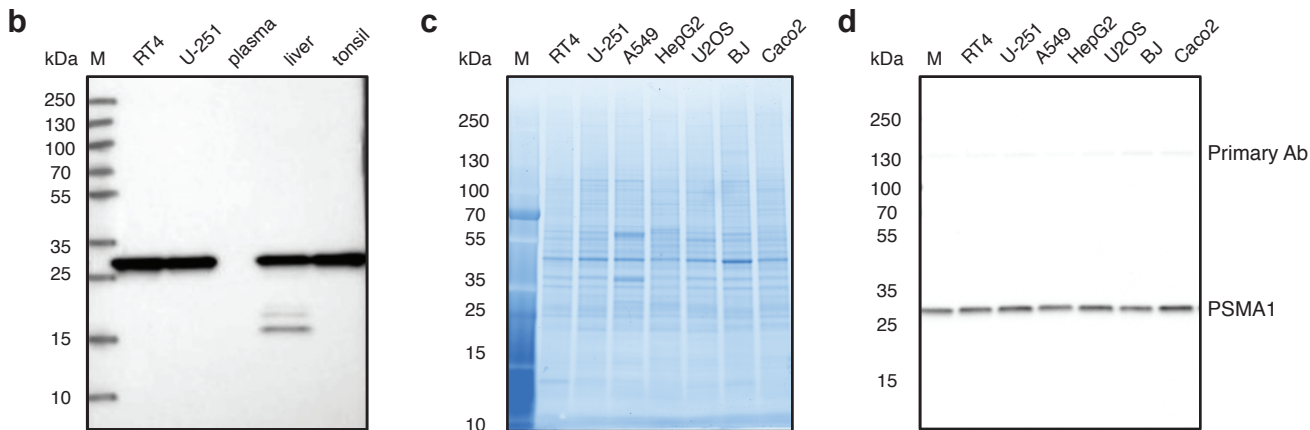

**Supplementary Figure 9 - Selection criteria for anti-PSMA1 as loading control for Western blot analysis across different cell lines. a.** Transcriptomics analysis of PSMA1 transcripts across 56 cell lines. **b.** Original Western blot from high throughput Western blot analysis performed within the Human Protein Atlas project (HPA037646). **c.** SDS-PAGE analysis of total protein content for seven cell-lines used for Western blot analysis for 24 antibodies. **d.** HPA037646 anti-PSMA1 as loading control and co-exposed with Primary Ab, (anti-RAB3GAP1).

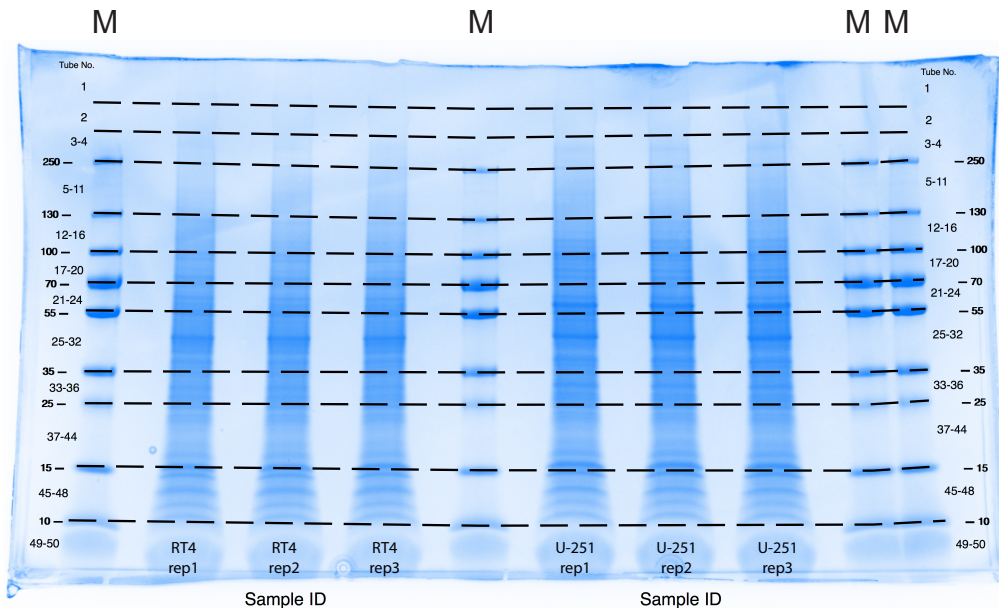

**Supplementary Figure 10 - SDS-PAGE gel cutout.** Bold numbers represent the molecular weight of the protein ladder. Each lane was cut into 50 individual gel-pieces (1-50), containing proteins of molecular sizes as specified in **Supplementary Data 7** and collected in separate tubes, which subsequently were subjected to digestion and LC-MS/MS analysis.

**Supplementary Table 1 - The cell lines used in the study**

| #  | Cell-line | Origin           | Sex & Age  | Original reference                                   | Source     | Description of cell line                                                       | Proteomics experiment |
|----|-----------|------------------|------------|------------------------------------------------------|------------|--------------------------------------------------------------------------------|-----------------------|
| 1  | A-431     | Skin             | Female, 85 | Giard et al., J Natl Cancer Inst 51: 1417 (1973)     | DSMZ       | Epidermoid carcinoma cell line                                                 | PRM                   |
| 2  | A549      | Lung             | Male, 58   | Giard et al., J Natl Cancer Inst 51: 1417 (1973)     | DSMZ       | Lung carcinoma cell line                                                       | PRM, TMT              |
| 3  | HEK 293   | Embryonal kidney | Female     | Graham et al., J Gen Virol 36: 59 (1977)             | DSMZ       | Embryonal kidney cell line, transformed by adenovirus type 5                   | PRM                   |
| 4  | U-2 OS    | Bone             | Female, 15 | Ponten J., Saksela E. Int. J. Cancer 2: 434 (1967)   | LGC/ATCC   | Osteosarcoma cell line                                                         | PRM, TMT              |
| 5  | Hep G2    | Liver            | Male, 15   | Aden et al., Nature 282: 615 (1979)                  | DSMZ       | Hepatocellular carcinoma cell line                                             | PRM, TMT              |
| 6  | HeLa      | Cervix           | Female, 31 | Scherer et al., J Exp Med 97: 695 (1953)             | DSMZ       | Cervical epithelial adenocarcinoma cell line                                   | PRM                   |
| 7  | RT4       | Urinary bladder  | Male, 63   | Rigby et al., Br J Cancer 24: 746 (1970)             | DSMZ/ECACC | Urinary bladder transitional cell carcinoma cell line                          | PRM, TMT              |
| 8  | SH-SY5Y   | Bone marrow      | Female, 4  | Biedler et al., Cancer Res 33: 2643 (1973)           | DSMZ       | Metastatic neuroblastoma, clonal subline of neuroepithelioma cell line SK-N-SH | PRM                   |
| 9  | BJ        | Foreskin         | Male       | Bodnar AG., et al. Science 279: 349-352 (1998)       | LGC/ATCC   | Adherent fibroblast cell line                                                  | TMT                   |
| 10 | CACO-2    | Colon            | Male, 72   | Fogh J., et al. J. Natl. Cancer Inst. 58: 209 (1977) | DSMZ       | Colon adenocarcinoma cell line                                                 | TMT                   |
| 11 | U-251 MG  | Brain            | Male       | Westermarck B., Int J Cancer12: 438 (1973)           | BW         | Glioblastoma cell line                                                         | TMT                   |

**Supplementary Table 2 - Summary of genes quantified by proteomics-based methods**

| Gene     | Type of assay            | Max   | Min   | CV% (across | Fold-change | Missing values |
|----------|--------------------------|-------|-------|-------------|-------------|----------------|
| ALDH1A2  | PRM (ratio-to-standard)  | 2.33  | 0.03  | 173         | 77.7        | 2              |
| ANXA1    | PRM (ratio-to-standard)  | 10.38 | 0.01  | 74          | 865.3       | 0              |
| ANXA3    | PRM (ratio-to-standard)  | 31.75 | 0.05  | 107         | 705.5       | 0              |
| ASS1     | PRM (ratio-to-standard)  | 4.30  | 0.01  | 107         | 358.0       | 0              |
| BPGM     | PRM (ratio-to-standard)  | 30.86 | 0.28  | 228         | 110.6       | 0              |
| CANT1    | PRM (ratio-to-standard)  | 0.70  | 0.20  | 45          | 3.5         | 0              |
| CAPG     | PRM (ratio-to-standard)  | 15.72 | 0.02  | 100         | 827.1       | 0              |
| CLPP     | PRM (ratio-to-standard)  | 5.50  | 1.59  | 42          | 3.5         | 0              |
| COX5B    | TMT (reporter intensity) | 7.04  | 2.55  | 35          | 2.8         | 0              |
| CYP51A1  | TMT (reporter intensity) | 2.48  | 0.92  | 40          | 2.7         | 0              |
| DDX21    | TMT (reporter intensity) | 25.57 | 9.86  | 37          | 2.6         | 0              |
| DECR1    | PRM (ratio-to-standard)  | 15.11 | 1.20  | 66          | 12.6        | 0              |
| EIF5     | TMT (reporter intensity) | 19.02 | 7.58  | 41          | 2.5         | 0              |
| EPS8     | PRM (ratio-to-standard)  | 3.25  | 0.08  | 101         | 39.6        | 0              |
| ERBB2    | PRM (ratio-to-standard)  | 4.28  | 0.30  | 102         | 14.4        | 1              |
| HNMT     | PRM (ratio-to-standard)  | 80.43 | 0.03  | 187         | 2513.5      | 0              |
| KPNA4    | TMT (reporter intensity) | 3.40  | 1.78  | 24          | 1.9         | 0              |
| LCP1     | PRM (ratio-to-standard)  | 71.11 | 0.01  | 219         | 6464.7      | 0              |
| LRRCS9   | TMT (reporter intensity) | 26.10 | 6.67  | 55          | 3.9         | 0              |
| MCM6     | TMT (reporter intensity) | 12.67 | 4.39  | 29          | 2.9         | 0              |
| MEF2D    | PRM (ratio-to-standard)  | 1.28  | 0.17  | 81          | 7.5         | 0              |
| MSN      | PRM (ratio-to-standard)  | 7.23  | 0.00  | 119         | 7225.0      | 0              |
| MSN      | TMT (reporter intensity) | 48.76 | 8.34  | 66          | 5.8         | 0              |
| NASP     | TMT (reporter intensity) | 91.58 | 13.41 | 62          | 6.8         | 0              |
| OSMR     | TMT (reporter intensity) | 0.52  | 0.09  | 52          | 5.5         | 0              |
| PAK1     | PRM (ratio-to-standard)  | 3.03  | 0.13  | 81          | 22.9        | 0              |
| PCYT2    | PRM (ratio-to-standard)  | 30.29 | 1.64  | 149         | 18.4        | 0              |
| PDIA3    | TMT (reporter intensity) | 81.23 | 30.03 | 38          | 2.7         | 0              |
| PIK3R1   | PRM (ratio-to-standard)  | 3.71  | 0.39  | 108         | 9.6         | 0              |
| PLGRKT   | TMT (reporter intensity) | 1.24  | 0.19  | 57          | 6.6         | 0              |
| PMPCA    | TMT (reporter intensity) | 3.59  | 1.69  | 24          | 2.1         | 0              |
| PPP1R13L | TMT (reporter intensity) | 13.83 | 3.01  | 59          | 4.6         | 0              |
| PRKCD    | PRM (ratio-to-standard)  | 7.30  | 0.61  | 91          | 11.9        | 0              |
| RAB3GAP1 | TMT (reporter intensity) | 10.66 | 6.07  | 20          | 1.8         | 0              |
| RRBP1    | PRM (ratio-to-standard)  | 16.74 | 0.68  | 129         | 24.8        | 0              |
| S100A10  | TMT (reporter intensity) | 8.02  | 0.88  | 59          | 9.2         | 0              |
| SCAF11   | TMT (reporter intensity) | 33.12 | 3.97  | 117         | 8.3         | 0              |
| SELENBP1 | PRM (ratio-to-standard)  | 13.62 | 0.02  | 138         | 567.6       | 0              |
| SFN      | PRM (ratio-to-standard)  | 8.44  | 0.15  | 85          | 55.2        | 1              |
| SRC      | PRM (ratio-to-standard)  | 7.22  | 0.17  | 99          | 43.0        | 0              |
| STOM     | PRM (ratio-to-standard)  | 13.30 | 0.14  | 136         | 97.8        | 0              |
| STUB1    | PRM (ratio-to-standard)  | 7.30  | 0.81  | 68          | 9.1         | 0              |
| STX4     | TMT (reporter intensity) | 3.43  | 1.79  | 22          | 1.9         | 0              |
| STXBP1   | PRM (ratio-to-standard)  | 0.46  | 0.02  | 97          | 24.4        | 0              |
| TKT      | TMT (reporter intensity) | 48.23 | 10.75 | 59          | 4.5         | 0              |
| TNS1     | TMT (reporter intensity) | 7.63  | 0.97  | 99          | 7.8         | 0              |
| TOMM20   | TMT (reporter intensity) | 0.96  | 0.58  | 17          | 1.7         | 0              |
| UGDH     | PRM (ratio-to-standard)  | 53.95 | 1.21  | 138         | 44.7        | 0              |
| VAR5     | TMT (reporter intensity) | 15.41 | 7.50  | 25          | 2.1         | 0              |



**Supplementary Table 3 - Pearson r and Spearman rho estimates for all Western blot bands and their correlation with MS and RNA data**

| Orthogonal validation method |           |                 | Proteomics validation |         |              |         | Transcriptomics validation |             |         |              |         |
|------------------------------|-----------|-----------------|-----------------------|---------|--------------|---------|----------------------------|-------------|---------|--------------|---------|
| Gene                         | Antibody  | Order in Fig 2c | Pearson r             | (p-val) | Spearman rho | (p-val) | MS experiment              | Pearson r   | (p-val) | Spearman rho | (p-val) |
| BPGM                         | HPA016493 | 1               | 1                     | <1E-04  | 0.58         | <1E-04  | PRM                        | 0.98        | <1E-04  | 0.58         | <1E-04  |
| PCYT2                        | HPA023034 | 2               | 1                     | <1E-04  | 0.43         | <1E-04  | PRM                        | 0.99        | <1E-04  | 0.4          | <1E-04  |
| HNMT                         | HPA035480 | 3               | 0.99                  | <1E-04  | 0.46         | <1E-04  | PRM                        | 0.95        | 0.0004  | 0.46         | 0.0004  |
| LCP1                         | HPA019493 | 4               | 0.99                  | <1E-04  | 0.87         | <1E-04  | PRM                        | 0.85        | 0.0079  | 0.87         | 0.0079  |
| PRKCD                        | HPA001890 | 5               | 0.99                  | <1E-04  | 0.94         | <1E-04  | PRM                        | 0.92        | 0.0013  | 0.74         | 0.0013  |
| RRBP1                        | HPA011924 | 6               | 0.99                  | <1E-04  | 0.87         | <1E-04  | PRM                        | 0.73        | 0.0389  | 0.85         | 0.0389  |
| SCAF11                       | HPA045456 | 7               | 0.99                  | 1E-04   | 0.43         | 1E-04   | TMT                        | 0.94        | 0.0017  | 0.39         | 0.0017  |
| TKT                          | HPA029481 | 8               | 0.99                  | <1E-04  | 0.89         | <1E-04  | TMT                        | 0.87        | 0.0107  | 0.36         | 0.0107  |
| ERBB2                        | HPA001338 | 9               | 0.98                  | 1E-04   | 0.8          | 1E-04   | PRM                        | 0.74        | 0.0548  | 0.53         | 0.0548  |
| MSN                          | HPA011135 | 10              | 0.98                  | 2E-04   | 0.96         | 2E-04   | TMT                        | 0.94        | 0.0015  | 0.93         | 0.0015  |
| PIK3R1                       | HPA001216 | 11              | 0.98                  | <1E-04  | 0.77         | <1E-04  | PRM                        | 0.86        | 0.0059  | 0.65         | 0.0059  |
| CAPG                         | HPA019092 | 12              | 0.97                  | 1E-04   | 0.99         | 1E-04   | PRM                        | 0.98        | <1E-04  | 0.95         | <1E-04  |
| DDX21                        | HPA036593 | 13              | 0.96                  | 6E-04   | 0.89         | 6E-04   | TMT                        | 0.95        | 0.0012  | 0.71         | 0.0012  |
| SFN                          | HPA011105 | 14              | 0.96                  | 6E-04   | 0.99         | 6E-04   | PRM                        | 0.85        | 0.0164  | 0.85         | 0.0164  |
| TNS1                         | HPA036089 | 15              | 0.96                  | 7E-04   | 0.8          | 7E-04   | TMT                        | 0.9         | 0.0051  | 0.76         | 0.0051  |
| ASS1                         | HPA020934 | 16              | 0.95                  | 3E-04   | 0.93         | 3E-04   | PRM                        | 0.72        | 0.0439  | 0.85         | 0.0439  |
| STOM                         | HPA010961 | 17              | 0.95                  | 3E-04   | 0.88         | 3E-04   | PRM                        | 0.7         | 0.0537  | 0.61         | 0.0537  |
| S100A10                      | HPA003340 | 18              | 0.94                  | 0.0015  | 0.96         | 0.0015  | TMT                        | 0.51        | 0.237   | 0.82         | 0.237   |
| MEF2D                        | HPA004807 | 19              | 0.93                  | 8E-04   | 0.67         | 8E-04   | PRM                        | 0.67        | 0.07    | 0.76         | 0.07    |
| CANT1                        | HPA019639 | 20              | 0.91                  | 0.0016  | 0.87         | 0.0016  | PRM                        | 0.35        | 0.396   | 0.19         | 0.396   |
| PAK1                         | HPA003565 | 21              | 0.91                  | 0.0015  | 0.98         | 0.0015  | PRM                        | 0.64        | 0.085   | 0.76         | 0.085   |
| PLGRKT                       | HPA011144 | 22              | 0.91                  | 0.0043  | 0.89         | 0.0043  | TMT                        | 0.82        | 0.0248  | 0.82         | 0.0248  |
| OSMR                         | HPA017278 | 23              | 0.9                   | 0.0062  | 0.79         | 0.0062  | TMT                        | 0.83        | 0.0223  | 0.79         | 0.0223  |
| EIF5                         | HPA000867 | 24              | 0.89                  | 0.0067  | 0.68         | 0.0067  | TMT                        | 0.49        | 0.2636  | 0.36         | 0.2636  |
| SRC                          | HPA030875 | 25              | 0.89                  | 0.003   | 0.8          | 0.003   | PRM                        | 0.73        | 0.0398  | 0.56         | 0.0398  |
| CLPP                         | HPA010649 | 26              | 0.88                  | 0.0042  | 0.83         | 0.0042  | PRM                        | 0.2         | 0.6409  | -0.12        | 0.6409  |
| ANXA1                        | HPA011272 | 27              | 0.86                  | 0.0068  | 0.78         | 0.0068  | PRM                        | 0.91        | 0.0018  | 0.92         | 0.0018  |
| SELENBP1                     | HPA011731 | 28              | 0.86                  | 0.0067  | 0.87         | 0.0067  | PRM                        | 0.37        | 0.3672  | 0.85         | 0.3672  |
| ANXA3                        | HPA013398 | 29              | 0.84                  | 0.0094  | 0.93         | 0.0094  | PRM                        | 0.81        | 0.0149  | 0.86         | 0.0149  |
| NASP                         | HPA028136 | 30              | 0.84                  | 0.0169  | 0.86         | 0.0169  | TMT                        | 0.67        | 0.0984  | 0.68         | 0.0984  |
| LRRCS9                       | HPA030829 | 31              | 0.83                  | 0.0217  | 0.96         | 0.0217  | TMT                        | 0.75        | 0.0516  | 0.5          | 0.0516  |
| TOMM20                       | HPA011562 | 32              | 0.83                  | 0.0213  | 0.68         | 0.0213  | TMT                        | 0.2         | 0.6608  | -0.18        | 0.6608  |
| EPS8                         | HPA003897 | 33              | 0.81                  | 0.0138  | 0.84         | 0.0138  | PRM                        | 0.93        | 0.0008  | 0.91         | 0.0008  |
| CYP51A1                      | HPA041325 | 34              | 0.8                   | 0.0292  | 0.77         | 0.0292  | TMT                        | 0.3         | 0.52    | 0.61         | 0.52    |
| CLPP                         | HPA070712 | 35              | 0.79                  | 0.02    | 0.71         | 0.02    | PRM                        | -0.2        | 0.6397  | -0.55        | 0.6397  |
| MSN                          | HPA011227 | 36              | 0.76                  | 0.0284  | 0.79         | 0.0284  | PRM                        | 0.97        | 0.0001  | 0.85         | 0.0001  |
| UGDH                         | HPA036656 | 37              | 0.75                  | 0.0317  | 0.93         | 0.0317  | PRM                        | 0.89        | 0.0034  | 0.98         | 0.0034  |
| PDIA3                        | HPA003230 | 38              | 0.73                  | 0.0636  | 0.96         | 0.0636  | TMT                        | 0.04        | 0.9296  | 0.43         | 0.9296  |
| STUB1                        | HPA041222 | 39              | 0.72                  | 0.0439  | 0.57         | 0.0439  | PRM                        | 0.71        | 0.0477  | 0.24         | 0.0477  |
| COX5B                        | HPA034517 | 40              | 0.66                  | 0.1046  | 0.75         | 0.1046  | TMT                        | 0.93        | 0.0027  | 0.64         | 0.0027  |
| KPNA4                        | HPA045500 | 41              | 0.63                  | 0.1327  | 0.43         | 0.1327  | TMT                        | 0.72        | 0.0656  | 0.68         | 0.0656  |
| DECR1                        | HPA023162 | 42              | 0.58                  | 0.131   | 0.4          | 0.131   | PRM                        | 0.37        | 0.3699  | -0.07        | 0.3699  |
| STUB1                        | HPA043531 | 43              | 0.58                  | 0.1293  | 0.55         | 0.1293  | PRM                        | 0.85        | 0.0072  | 0.45         | 0.0072  |
| PPP1R13L                     | HPA041231 | 44              | 0.57                  | 0.1863  | 0.79         | 0.1863  | TMT                        | 0.78        | 0.0392  | 0.79         | 0.0392  |
| PMPCA                        | HPA021648 | 45              | 0.54                  | 0.2127  | 0.29         | 0.2127  | TMT                        | 0.86        | 0.0127  | 0.75         | 0.0127  |
| MCM6                         | HPA004818 | 46              | 0.51                  | 0.2392  | 0.5          | 0.2392  | TMT                        | 0.51        | 0.2421  | 0.29         | 0.2421  |
| VAR5                         | HPA046710 | 47              | 0.36                  | 0.4266  | 0.32         | 0.4266  | TMT                        | 0.53        | 0.2202  | 0.32         | 0.2202  |
| STX4                         | HPA001330 | 48              | <b>0.35</b>           | 0.4395  | 0.71         | 0.4395  | TMT                        | <b>0.55</b> | 0.2007  | 0.57         | 0.2007  |
| HNMT                         | HPA035481 | 49              | 0.23                  | 0.5846  | 0.43         | 0.5846  | PRM                        | 0.27        | 0.5122  | 0.52         | 0.5122  |
| RAB3GAP1                     | HPA034494 | 50              | 0.19                  | 0.6848  | 0.07         | 0.6848  | TMT                        | 0.41        | 0.3654  | 0.32         | 0.3654  |
| STOM                         | HPA011419 | 51              | 0.02                  | 0.9557  | 0            | 0.9557  | PRM                        | -0.28       | 0.5005  | 0            | 0.5005  |
| STXBP1                       | HPA008209 | 52              | -0.01                 | 0.9842  | -0.19        | 0.9842  | PRM                        | -0.02       | 0.9626  | 0            | 0.9626  |
| ALDH1A2                      | HPA010022 | 53              | -0.27                 | 0.6113  | -0.39        | 0.6113  | PRM                        | -0.16       | 0.7135  | -0.65        | 0.7135  |

**Supplementary Table 4** - The criteria used here for validation of the Human Protein Atlas antibodies and the number of antibodies and genes with enhanced validation using these criteria. If several bands are presented on the Western blot, only the strongest stained band can be validated and this band needs to be clearly separated from the weaker bands (if present)

| <b>Validation strategy</b> | <b>Criteria</b>                                                                                                                                                                                                                                                                                                                                                                                                                | <b>No ab</b> | <b>No genes</b> |
|----------------------------|--------------------------------------------------------------------------------------------------------------------------------------------------------------------------------------------------------------------------------------------------------------------------------------------------------------------------------------------------------------------------------------------------------------------------------|--------------|-----------------|
| Genetic                    | At least 25% knock-down in staining on the Western blot for the sample treated with gene-specific siRNA reagent                                                                                                                                                                                                                                                                                                                | 217          | 211             |
| Recombinant expression     | The antibody must show a strong band on the Western blot for the cell line with recombinant expression and no or faint band in the control.                                                                                                                                                                                                                                                                                    | 2,190        | 1,915           |
| Orthogonal                 | Correlation in staining on the Western blot for protein target with the antibody-independent method with at least a 5-fold difference in expression levels between two samples. Antibody is also considered validated if the expression levels (trend) in the two cell lines supported the correlation and the size of the band was confirmed either by theoretical size estimate or by the capture MS method described above. | 691          | 644             |
| Independent antibody       | Correlation in staining using at least two antibodies with non-overlapping epitopes. See orthogonal for detailed description.                                                                                                                                                                                                                                                                                                  | 1,922        | 936             |
| Capture MS                 | Target protein peptide are present in the same part of the electrophoresis gel as the antibody-stained band in the Western blot                                                                                                                                                                                                                                                                                                | 2,888        | 2,332           |

**Supplementary Table 5 - Success rate per validation pillar**

|                  | <b>Ortogonal</b> | <b>Capture MS</b> | <b>Independent</b> | <b>Genetic</b> | <b>Recombinant</b> |
|------------------|------------------|-------------------|--------------------|----------------|--------------------|
| Enhanced         | 711              | 2888              | 1922               | 217            | 2190               |
| Uncertain        | 990              | 762               | 439                | 292            | 62                 |
| Not done         | 4313             | 2364              | 3653               | 5505           | 3762               |
| Evaluated Abs    | 1701             | 3650              | 2361               | 509            | 2252               |
| Success rate (%) | 41.8             | 79.1              | 81.4               | 42.6           | 97.2               |
| Unique Genes     | 644              | 2332              | 936                | 211            | 1915               |

### Supplementary Table 6 - QPrESTs used in this assay

| <b>QPrEST ID</b> | <b>HPRR</b> | <b>QPrEST ID</b> |
|------------------|-------------|------------------|
| UGDH             | HPRR3000140 | QPrEST21479      |
| STXBP1           | HPRR1920071 | QPrEST25425      |
| STUB1            | HPRR3160243 | QPrEST38867      |
| STOM             | HPRR1951144 | QPrEST23874      |
| SRC              | HPRR290019  | QPrEST40016      |
| SFN              | HPRR1510038 | QPrEST24094      |
| SELENBP1         | HPRR1370137 | QPrEST26348      |
| RRBP1            | HPRR1950729 | QPrEST38025      |
| PRKCD            | HPRR260307  | QPrEST25906      |
| PIK3R1           | HPRR290105  | QPrEST23901      |
| PCYT2            | HPRR2501289 | QPrEST34825      |
| PAK1             | HPRR490019  | QPrEST26317      |
| MSN              | HPRR1970043 | QPrEST23841      |
| MEF2D            | HPRR680167  | QPrEST26851      |
| LCP1             | HPRR2350017 | QPrEST23183      |
| HNMT             | HPRR2930159 | QPrEST24840      |
| ERBB2            | HPRR320002  | QPrEST22631      |
| ERBB2            | HPRR320022  | QPrEST40018      |
| EPS8             | HPRR620024  | QPrEST26221      |
| DECR1            | HPRR2540115 | QPrEST27322      |
| CLPP             | HPRR1440011 | QPrEST27335      |
| CAPG             | HPRR2370009 | QPrEST24357      |
| CANT1            | HPRR2390065 | QPrEST32926      |
| BPGM             | HPRR2100041 | QPrEST22779      |
| ASS1             | HPRR2470235 | QPrEST22452      |
| ANXA3            | HPRR2050268 | QPrEST23118      |
| ANXA1            | HPRR1920070 | QPrEST22604      |
| ALDH1A2          | HPRR1850063 | QPrEST21970      |
